# Supplementary material for: Fluorene exposure among PAH-exposed workers is associated with epigenetic markers related to lung cancer
Source: PubMed Central journal article supplement (PMC7306866; doi:10.1136/oemed-2020-106413), 2020-05-08
Supplement: oemed-2020-106413supp001.pdf [file oemed-2020-106413supp001.pdf]

# Supplementary material

## Fluorene exposure among PAH-exposed workers is associated with epigenetic markers related to lung cancer

Ayman Alhamdow<sup>1,†</sup>, Yona J. Essig<sup>2,†</sup>, Annette M. Kraiss<sup>2</sup>, Per Gustavsson<sup>1,3</sup>, Håkan Tinnerberg<sup>4</sup>, Christian Lindh<sup>2</sup>, Jessika Hagberg<sup>5,6</sup>, Pål Graff<sup>7</sup>, Maria Albin<sup>1,2,3</sup>, Karin Broberg<sup>1,2,\*</sup>

1 Institute of Environmental Medicine, Karolinska Institutet, Stockholm, Sweden.

2 Division of Occupational and Environmental Medicine, Department of Laboratory Medicine, Lund University, Lund, Sweden.

3 Centre for Occupational and Environmental Medicine (CAMM), Region Stockholm, Stockholm, Sweden.

4 Section of Occupational and Environmental Medicine, Sahlgrenska Academy at University of Gothenburg, Gothenburg, Sweden.

5 MTM Research Centre, School of Science and Technology, Örebro University, Örebro, Sweden.

6 Department of Occupational and Environmental Medicine, Faculty of Medicine and Health, Örebro University, Örebro, Sweden.

7 National Institute of Occupational Health (STAMI), Oslo, Norway.

†These authors contributed equally to this work.

\*To whom correspondence should be addressed:

Karin Broberg  
Unit of Metals & Health  
Institute of Environmental Medicine  
Karolinska Institutet  
Nobels Väg 13  
SE-171 77 Stockholm, Sweden  
Tel: +46 8 524 874 05  
Fax: +46 8 33 69 81  
Email: karin.broberg@ki.se

**Table S1.** Intercorrelations between PAH metabolites (including high-molecular-weight metabolites measured in a previous study [Alhamdow et al. 2018]) evaluated by Spearman's correlations among former/never smoking chimney sweeps, controls, and creosote-exposed workers.

| Group           |                      |                      | 1-OH-Pyr | 2-OH-Phe | 3-OH-BaP | 3-OH-BaA | 1-OH-Phe | $\Sigma$ 2-,3-OH-Phe | 4-OH-Phe | $\Sigma$ OH-Phe |
|-----------------|----------------------|----------------------|----------|----------|----------|----------|----------|----------------------|----------|-----------------|
| Controls        | 2-OH-Phe             | $r_s$                | 0.444    |          |          |          |          |                      |          |                 |
|                 |                      | $P$ value (2-tailed) | <0.001   |          |          |          |          |                      |          |                 |
|                 |                      | $n$                  | 127      |          |          |          |          |                      |          |                 |
|                 | 3-OH-BaP             | $r_s$                | -0.025   | -0.038   |          |          |          |                      |          |                 |
|                 |                      | $P$ value (2-tailed) | 0.800    | 0.696    |          |          |          |                      |          |                 |
|                 |                      | $n$                  | 108      | 108      |          |          |          |                      |          |                 |
|                 | 3-OH-BaA             | $r_s$                | 0.052    | 0.187    | 0.380    |          |          |                      |          |                 |
|                 |                      | $P$ value (2-tailed) | 0.572    | 0.040    | <0.001   |          |          |                      |          |                 |
|                 |                      | $n$                  | 121      | 121      | 108      |          |          |                      |          |                 |
|                 | 1-OH-Phe             | $r_s$                | 0.388    | 0.714    | -0.038   | 0.101    |          |                      |          |                 |
|                 |                      | $P$ value (2-tailed) | <0.001   | <0.001   | 0.695    | 0.270    |          |                      |          |                 |
|                 |                      | $n$                  | 127      | 127      | 108      | 121      |          |                      |          |                 |
|                 | $\Sigma$ 2-,3-OH-Phe | $r_s$                | 0.444    | 0.957    | 0.017    | 0.206    | 0.721    |                      |          |                 |
|                 |                      | $P$ value (2-tailed) | <0.001   | <0.001   | 0.863    | 0.023    | <0.001   |                      |          |                 |
|                 |                      | $n$                  | 127      | 127      | 108      | 121      | 127      |                      |          |                 |
|                 | 4-OH-Phe             | $r_s$                | 0.138    | 0.497    | 0.033    | 0.251    | 0.404    | 0.538                |          |                 |
|                 |                      | $P$ value (2-tailed) | 0.122    | <0.001   | 0.733    | 0.005    | <0.001   | <0.001               |          |                 |
|                 |                      | $n$                  | 127      | 127      | 108      | 121      | 127      | 127                  |          |                 |
|                 | $\Sigma$ OH-Phe      | $r_s$                | 0.425    | 0.866    | -0.017   | 0.177    | 0.944    | 0.890                | 0.541    |                 |
|                 |                      | $P$ value (2-tailed) | <0.001   | <0.001   | 0.865    | 0.052    | <0.001   | <0.001               | <0.001   |                 |
|                 |                      | $n$                  | 127      | 127      | 108      | 121      | 127      | 127                  | 127      |                 |
| $\Sigma$ OH-Flu | $r_s$                | 0.324                | 0.658    | -0.082   | 0.126    | 0.622    | 0.661    | 0.491                | 0.675    |                 |
|                 | $P$ value (2-tailed) | <0.001               | <0.001   | 0.401    | 0.169    | <0.001   | <0.001   | <0.001               | <0.001   |                 |
|                 | $n$                  | 127                  | 127      | 108      | 121      | 127      | 127      | 127                  | 127      |                 |
| Chimney sweeps  | 2-OH-Phe             | $r_s$                | 0.859    |          |          |          |          |                      |          |                 |
|                 |                      | $P$ value (2-tailed) | <0.001   |          |          |          |          |                      |          |                 |
|                 |                      | $n$                  | 120      |          |          |          |          |                      |          |                 |
|                 | 3-OH-BaP             | $r_s$                | 0.769    | 0.678    |          |          |          |                      |          |                 |
|                 |                      | $P$ value (2-tailed) | <0.001   | <0.001   |          |          |          |                      |          |                 |
|                 |                      | $n$                  | 111      | 111      |          |          |          |                      |          |                 |
|                 | 3-OH-BaA             | $r_s$                | 0.853    | 0.779    | 0.789    |          |          |                      |          |                 |
|                 |                      | $P$ value (2-tailed) | <0.001   | <0.001   | <0.001   |          |          |                      |          |                 |

|              |                           |                           |                           |        |        |        |        |        |        |        |
|--------------|---------------------------|---------------------------|---------------------------|--------|--------|--------|--------|--------|--------|--------|
|              | 1-OH-Phe                  | <i>n</i>                  | 115                       | 115    | 111    |        |        |        |        |        |
|              |                           | <i>r<sub>S</sub></i>      | 0.828                     | 0.905  | 0.614  | 0.733  |        |        |        |        |
|              |                           | <i>P</i> value (2-tailed) | <0.001                    | <0.001 | <0.001 | <0.001 |        |        |        |        |
|              | ∑2-,3-OH-Phe              | <i>n</i>                  | 120                       | 120    | 111    | 115    |        |        |        |        |
|              |                           | <i>r<sub>S</sub></i>      | 0.888                     | 0.969  | 0.698  | 0.782  | 0.921  |        |        |        |
|              |                           | <i>P</i> value (2-tailed) | <0.001                    | <0.001 | <0.001 | <0.001 | <0.001 |        |        |        |
|              | 4-OH-Phe                  | <i>n</i>                  | 120                       | 120    | 111    | 115    | 120    |        |        |        |
|              |                           | <i>r<sub>S</sub></i>      | 0.722                     | 0.872  | 0.491  | 0.670  | 0.881  | 0.882  |        |        |
|              |                           | <i>P</i> value (2-tailed) | <0.001                    | <0.001 | <0.001 | <0.001 | <0.001 | <0.001 |        |        |
|              | ∑OH-Phe                   | <i>n</i>                  | 120                       | 120    | 111    | 115    | 120    | 120    | 120    |        |
|              |                           | <i>r<sub>S</sub></i>      | 0.874                     | 0.961  | 0.668  | 0.774  | 0.969  | 0.986  | 0.908  |        |
|              |                           | <i>P</i> value (2-tailed) | <0.001                    | <0.001 | <0.001 | <0.001 | <0.001 | <0.001 | <0.001 |        |
|              | ∑OH-Flu                   | <i>n</i>                  | 120                       | 120    | 111    | 115    | 120    | 120    | 120    |        |
|              |                           | <i>r<sub>S</sub></i>      | 0.702                     | 0.788  | 0.588  | 0.661  | 0.810  | 0.828  | 0.723  | 0.833  |
|              |                           | <i>P</i> value (2-tailed) | <0.001                    | <0.001 | <0.001 | <0.001 | <0.001 | <0.001 | <0.001 | <0.001 |
|              | Creosote-exposed workers  | 2-OH-Phe                  | <i>n</i>                  |        |        |        |        |        |        |        |
|              |                           |                           | <i>r<sub>S</sub></i>      | 0.707  |        |        |        |        |        |        |
|              |                           |                           | <i>P</i> value (2-tailed) | 0.003  |        |        |        |        |        |        |
| 3-OH-BaP     |                           | <i>n</i>                  | 15                        |        |        |        |        |        |        |        |
|              |                           | <i>r<sub>S</sub></i>      | -0.275                    | -0.200 |        |        |        |        |        |        |
|              |                           | <i>P</i> value (2-tailed) | 0.321                     | 0.475  |        |        |        |        |        |        |
| 3-OH-BaA     |                           | <i>n</i>                  | 15                        | 15     |        |        |        |        |        |        |
|              |                           | <i>r<sub>S</sub></i>      | 0.479                     | 0.418  | -0.350 |        |        |        |        |        |
|              |                           | <i>P</i> value (2-tailed) | 0.071                     | 0.121  | 0.201  |        |        |        |        |        |
| 1-OH-Phe     |                           | <i>n</i>                  | 15                        | 15     | 15     | 15     |        |        |        |        |
|              |                           | <i>r<sub>S</sub></i>      | 0.532                     | 0.554  | -0.550 | 0.368  |        |        |        |        |
|              |                           | <i>P</i> value (2-tailed) | 0.041                     | 0.032  | 0.034  | 0.177  |        |        |        |        |
| ∑2-,3-OH-Phe |                           | <i>n</i>                  | 15                        | 15     | 15     | 15     | 15     |        |        |        |
|              |                           | <i>r<sub>S</sub></i>      | 0.725                     | 0.971  | -0.196 | 0.421  | 0.546  |        |        |        |
|              |                           | <i>P</i> value (2-tailed) | 0.002                     | <0.001 | 0.483  | 0.118  | 0.035  |        |        |        |
| 4-OH-Phe     |                           | <i>n</i>                  | 15                        | 15     | 15     | 15     | 15     | 15     |        |        |
|              |                           | <i>r<sub>S</sub></i>      | 0.482                     | 0.754  | -0.293 | 0.307  | 0.718  | 0.789  |        |        |
|              |                           | <i>P</i> value (2-tailed) | 0.069                     | 0.001  | 0.289  | 0.265  | 0.003  | <0.001 |        |        |
| ∑OH-Phe      | <i>n</i>                  | 15                        | 15                        | 15     | 15     | 15     | 15     |        |        |        |
|              | <i>r<sub>S</sub></i>      | 0.686                     | 0.861                     | -0.400 | 0.400  | 0.868  | 0.871  | 0.882  |        |        |
|              | <i>P</i> value (2-tailed) | 0.005                     | <0.001                    | 0.140  | 0.140  | <0.001 | <0.001 | <0.001 |        |        |

|         |                           |       |       |        |       |       |       |       |       |
|---------|---------------------------|-------|-------|--------|-------|-------|-------|-------|-------|
|         | <i>n</i>                  | 15    | 15    | 15     | 15    | 15    | 15    | 15    | 15    |
| ΣOH-Flu | <i>r<sub>s</sub></i>      | 0.718 | 0.650 | -0.250 | 0.411 | 0.643 | 0.586 | 0.468 | 0.682 |
|         | <i>P</i> value (2-tailed) | 0.003 | 0.009 | 0.369  | 0.128 | 0.010 | 0.022 | 0.079 | 0.005 |
|         | <i>n</i>                  | 15    | 15    | 15     | 15    | 15    | 15    | 15    | 15    |

Abbreviations: 1-OH-Pyr (1-hydroxypyrene), 2-OH-Phe (2-hydroxyphenanthrene), 3-OH-BaP (3-hydroxybenzo[a]pyrene), 3-OH-BaA (3-hydroxybenzo[a]anthracene), Σ2,3-OH-Phe (sum of 2- and 3-hydroxyphenanthrene), 4-OH-Phe (4-hydroxyphenanthrene), ΣOH-Phe (Sum of 1-, 2-, 3-, and 4-hydroxyphenanthrene), ΣOH-Flu (sum of 2- and 3-hydroxyfluorene).

**Table S2.** Linear regression analyses for the associations between urinary concentrations of  $\Sigma$ OH-fluorene (sum of 2- and 3-OH fluorene:  $\mu\text{g/g}$  creatinine) and cancer biomarkers among never smoking chimney sweeps and controls adjusting for age [B=unstandardised beta estimate, 95%CI= 95% confidence interval].

|                                 | <i>Chimney sweeps (n=70)</i> |       | <i>Controls (n=83)</i>  |      |
|---------------------------------|------------------------------|-------|-------------------------|------|
|                                 | B (95% CI) <sup>a</sup>      | P     | B (95% CI) <sup>a</sup> | P    |
| Relative telomere length        | 0.0066 (-0.076, 0.090)       | 0.87  | 0.0073 (-0.20, 0.21)    | 0.94 |
| Relative mtDNAcn                | 0.021 (-0.094, 0.14)         | 0.72  | -0.046 (-0.35, 0.26)    | 0.77 |
| <i>F2RL3</i> _CpG1              | -0.75 (-3.4, 1.9)            | 0.58  | -4.0 (-11, 3.0)         | 0.26 |
| <i>F2RL3</i> _CpG2 (cg03636183) | 0.43 (-1.9, 2.7)             | 0.71  | -1.7 (-7.0, 3.7)        | 0.54 |
| <i>AHRR</i> _CpG1               | -1.8 (-6.4, 2.7)             | 0.42  | -1.6 (-13, 10.1)        | 0.78 |
| <i>AHRR</i> _CpG2               | -4.1 (-8.0, -0.16)           | 0.042 | 4.8 (-4.6, 14.3)        | 0.31 |
| <i>AHRR</i> _CpG3 (cg05575921)  | -4.3 (-9.7, 1.1)             | 0.11  | -1.4 (-11, 8.1)         | 0.77 |

<sup>a</sup>Outcome (DNA methylation) = intercept + B.( $\Sigma$ OH-fluorene) + B1.(age)

**Table S3.** Linear regression analyses for the association between urinary concentrations of PAH metabolites and cancer biomarkers among chimney sweeps and creosote-exposed workers [B=unstandardised beta estimate, 95%CI= 95% confidence interval].

|                                      | <b>Model 1<br/>(unadjusted)</b> |      | <b>Model 2<br/>(age- and smoking-adjusted)</b> |      |
|--------------------------------------|---------------------------------|------|------------------------------------------------|------|
|                                      | B (95% CI)                      | P    | B (95% CI)                                     | P    |
| <b>Chimney sweeps</b>                | <b>n=143*</b>                   |      | <b>n=142*</b>                                  |      |
| <b>1-OH-Phe<br/>(µg/g crea.)</b>     |                                 |      |                                                |      |
| Relative telomere length             | 0.0090 (-0.055, 0.072)          | 0.79 | 0.022 (-0.038, 0.081)                          | 0.47 |
| Relative mtDNAcn                     | -0.013 (-0.12, 0.091)           | 0.81 | -0.0048 (-0.11, 0.10)                          | 0.93 |
| <i>F2RL3</i> _CpG1                   | -1.9 (-6.1, 2.2)                | 0.36 | -1.6 (-4.9, 1.7)                               | 0.33 |
| <i>F2RL3</i> _CpG2<br>(cg03636183)   | 0.090 (-3.7, 3.9)               | 0.96 | 0.17 (-2.7, 3.1)                               | 0.91 |
| <i>AHRR</i> _CpG1                    | 1.9 (-5.6, 9.4)                 | 0.61 | 2.7 (-3.0, 8.3)                                | 0.36 |
| <i>AHRR</i> _CpG2                    | 0.94 (-6.2, 8.0)                | 0.79 | 1.9 (-3.2, 6.9)                                | 0.46 |
| <i>AHRR</i> _CpG3<br>(cg05575921)    | 0.60 (-8.8, 10)                 | 0.90 | 1.9 (-4.3, 8.0)                                | 0.55 |
| <b>Σ2-,3-OH-Phe<br/>(µg/g crea.)</b> |                                 |      |                                                |      |
| Relative telomere length             | 0.0070 (-0.022, 0.035)          | 0.65 | 0.013 (-0.013, 0.039)                          | 0.33 |
| Relative mtDNAcn                     | -0.0092 (-0.056, 0.037)         | 0.70 | -0.0042 (-0.051, 0.042)                        | 0.86 |
| <i>F2RL3</i> _CpG1                   | -1.2 (-3.1, 0.67)               | 0.21 | -0.96 (-2.4, 0.50)                             | 0.20 |
| <i>F2RL3</i> _CpG2<br>(cg03636183)   | -0.17 (-1.9, 1.6)               | 0.85 | -0.06 (-1.3, 1.2)                              | 0.93 |
| <i>AHRR</i> _CpG1                    | 0.66 (-2.7, 4.0)                | 0.70 | 1.1 (-1.4, 3.6)                                | 0.39 |
| <i>AHRR</i> _CpG2                    | 0.33 (-2.9, 3.5)                | 0.84 | 0.77 (-1.5, 3.0)                               | 0.50 |
| <i>AHRR</i> _CpG3<br>(cg05575921)    | -0.041 (-4.3, 4.2)              | 0.98 | 0.58 (-2.2, 3.3)                               | 0.67 |
| <b>4-OH-Phe<br/>(ng/g crea.)</b>     |                                 |      |                                                |      |
| Relative telomere length             | 0.000079 (-0.00036, 0.00052)    | 0.72 | 0.00021 (-0.00020, 0.00062)                    | 0.32 |
| Relative mtDNAcn                     | 0.00020 (-0.00051, 0.00090)     | 0.58 | 0.00029 (-0.00042, 0.0010)                     | 0.43 |
| <i>F2RL3</i> _CpG1                   | -0.022 (-0.050, 0.0068)         | 0.14 | -0.011 (-0.034, 0.011)                         | 0.32 |
| <i>F2RL3</i> _CpG2<br>(cg03636183)   | -0.011 (-0.038, 0.015)          | 0.40 | -0.0040 (-0.024, 0.016)                        | 0.69 |
| <i>AHRR</i> _CpG1                    | -0.0090 (-0.061, 0.043)         | 0.73 | 0.010 (-0.029, 0.049)                          | 0.61 |
| <i>AHRR</i> _CpG2                    | -0.014 (-0.063, 0.035)          | 0.56 | 0.0051 (-0.030, 0.040)                         | 0.77 |
| <i>AHRR</i> _CpG3<br>(cg05575921)    | -0.022 (-0.087, 0.042)          | 0.49 | 0.0053 (-0.037, 0.048)                         | 0.81 |
| <b>ΣOH-Phe<br/>(µg/g crea.)</b>      |                                 |      |                                                |      |
| Relative telomere length             | 0.0040 (-0.015, 0.023)          | 0.69 | 0.0084 (-0.0096, 0.026)                        | 0.36 |
| Relative mtDNAcn                     | -0.0050 (-0.036, 0.026)         | 0.75 | -0.0018 (-0.034, 0.030)                        | 0.91 |
| <i>F2RL3</i> _CpG1                   | -0.77 (-2.0, 0.49)              | 0.23 | -0.61 (-1.6, 0.38)                             | 0.23 |
| <i>F2RL3</i> _CpG2<br>(cg03636183)   | -0.089 (-1.3, 1.1)              | 0.88 | -0.020 (-0.89, 0.85)                           | 0.96 |
| <i>AHRR</i> _CpG1                    | 0.46 (-1.8, 2.8)                | 0.69 | 0.77 (-0.95, 2.5)                              | 0.38 |
| <i>AHRR</i> _CpG2                    | 0.21 (-2.0, 2.4)                | 0.85 | 0.54 (-1.0, 2.1)                               | 0.49 |
| <i>AHRR</i> _CpG3<br>(cg05575921)    | -0.0068 (-2.9, 2.8)             | 1.0  | 0.45 (-1.4, 2.3)                               | 0.63 |
| <b>Creosote-exposed<br/>workers</b>  | <b>n=19</b>                     |      | <b>n=18</b>                                    |      |

|                                                                    |                                    |      |                                      |      |
|--------------------------------------------------------------------|------------------------------------|------|--------------------------------------|------|
| <b>1-OH-Phe</b><br>( $\mu\text{g/g crea.}$ )                       |                                    |      |                                      |      |
| Relative telomere length                                           | 0.00053 (-0.0034, 0.0045)          | 0.78 | -0.000041 (-0.0049, 0.0049)          | 0.99 |
| Relative mtDNAcn                                                   | 0.0026 (-0.0059, 0.011)            | 0.53 | 0.0019 (-0.0085, 0.012)              | 0.70 |
| <i>F2RL3</i> _CpG1                                                 | -0.036 (-0.31, 0.24)               | 0.78 | -0.07 (-0.40, 0.26)                  | 0.65 |
| <i>F2RL3</i> _CpG2<br>(cg03636183)                                 | -0.019 (-0.28, 0.24)               | 0.88 | -0.098 (-0.40, 0.21)                 | 0.50 |
| <i>AHRR</i> _CpG1                                                  | 0.053 (-0.47, 0.57)                | 0.83 | -0.096 (-0.70, 0.50)                 | 0.73 |
| <i>AHRR</i> _CpG2                                                  | 0.057 (-0.45, 0.57)                | 0.82 | -0.093 (-0.67, 0.48)                 | 0.73 |
| <i>AHRR</i> _CpG3<br>(cg05575921)                                  | 0.05 (-0.53, 0.63)                 | 0.86 | -0.047 (-0.61, 0.51)                 | 0.86 |
| <b><math>\Sigma</math>2-,3-OH-Phe</b><br>( $\mu\text{g/g crea.}$ ) |                                    |      |                                      |      |
| Relative telomere length                                           | 0.00060 (-0.0022, 0.0034)          | 0.65 | -0.000074 (-0.0029, 0.0028)          | 0.96 |
| Relative mtDNAcn                                                   | 0.000048 (-0.0061, 0.0062)         | 0.99 | 0.0013 (-0.0051, 0.0077)             | 0.67 |
| <i>F2RL3</i> _CpG1                                                 | -0.051 (-0.24, 0.14)               | 0.58 | -0.051 (-0.24, 0.14)                 | 0.57 |
| <i>F2RL3</i> _CpG2<br>(cg03636183)                                 | -0.033 (-0.21, 0.15)               | 0.70 | -0.048 (-0.23, 0.13)                 | 0.57 |
| <i>AHRR</i> _CpG1                                                  | 0.14 (-0.21, 0.50)                 | 0.41 | 0.091 (-0.25, 0.43)                  | 0.58 |
| <i>AHRR</i> _CpG2                                                  | 0.11 (-0.25, 0.46)                 | 0.53 | 0.051 (-0.28, 0.38)                  | 0.75 |
| <i>AHRR</i> _CpG3<br>(cg05575921)                                  | 0.11 (-0.29, 0.52)                 | 0.56 | 0.085 (-0.23, 0.40)                  | 0.58 |
| <b>4-OH-Phe</b><br>( $\text{ng/g crea.}$ )                         |                                    |      |                                      |      |
| Relative telomere length                                           | 0.0000070 (-0.000014,<br>0.000028) | 0.50 | -0.00000035 (-0.000024,<br>0.000023) | 0.98 |
| Relative mtDNAcn                                                   | 0.000013 (-0.000033,<br>0.000059)  | 0.56 | 0.000024 (-0.000024, 0.000072)       | 0.30 |
| <i>F2RL3</i> _CpG1                                                 | 0.00056 (-0.00088, 0.0020)         | 0.42 | -0.00014 (-0.0017, 0.0014)           | 0.85 |
| <i>F2RL3</i> _CpG2<br>(cg03636183)                                 | 0.00072 (-0.00060, 0.0020)         | 0.27 | 0.000030 (-0.0015, 0.0015)           | 0.97 |
| <i>AHRR</i> _CpG1                                                  | 0.0018 (-0.00084, 0.0044)          | 0.17 | 0.00076 (-0.0021, 0.0036)            | 0.57 |
| <i>AHRR</i> _CpG2                                                  | 0.0017 (-0.00090, 0.0043)          | 0.19 | 0.00068 (-0.0021, 0.0034)            | 0.60 |
| <i>AHRR</i> _CpG3<br>(cg05575921)                                  | 0.0021 (-0.00078, 0.0050)          | 0.14 | 0.00081 (-0.0018, 0.0035)            | 0.52 |
| <b><math>\Sigma</math>OH-Phe</b><br>( $\mu\text{g/g crea.}$ )      |                                    |      |                                      |      |
| Relative telomere length                                           | 0.00035 (-0.0013, 0.002)           | 0.66 | -0.000037 (-0.0018, 0.0018)          | 0.97 |
| Relative mtDNAcn                                                   | 0.00056 (-0.0031, 0.0042)          | 0.75 | 0.00091 (-0.0030, 0.0049)            | 0.62 |
| <i>F2RL3</i> _CpG1                                                 | -0.021 (-0.14, 0.094)              | 0.70 | -0.031 (-0.15, 0.089)                | 0.59 |
| <i>F2RL3</i> _CpG2<br>(cg03636183)                                 | -0.011 (-0.12, 0.096)              | 0.83 | -0.032 (-0.14, 0.080)                | 0.54 |
| <i>AHRR</i> _CpG1                                                  | 0.071 (-0.14, 0.29)                | 0.49 | 0.028 (-0.19, 0.25)                  | 0.79 |
| <i>AHRR</i> _CpG2                                                  | 0.058 (-0.15, 0.27)                | 0.57 | 0.012 (-0.20, 0.22)                  | 0.90 |
| <i>AHRR</i> _CpG3<br>(cg05575921)                                  | 0.062 (-0.18, 0.30)                | 0.59 | 0.033 (-0.17, 0.24)                  | 0.74 |

Abbreviations: mtDNAcn (mitochondrial DNA copy number);  $\Sigma$ 2-,3-OH-Phe (sum of 2- and 3-hydroxyphenanthrene);  $\Sigma$ OH-Phe (Sum of 1-, 2-, 3-, and 4-hydroxyphenanthrene)

\*There was 1 missing case for some of the outcomes (e.g. *AHRR*\_CpG3\_cg05575921)

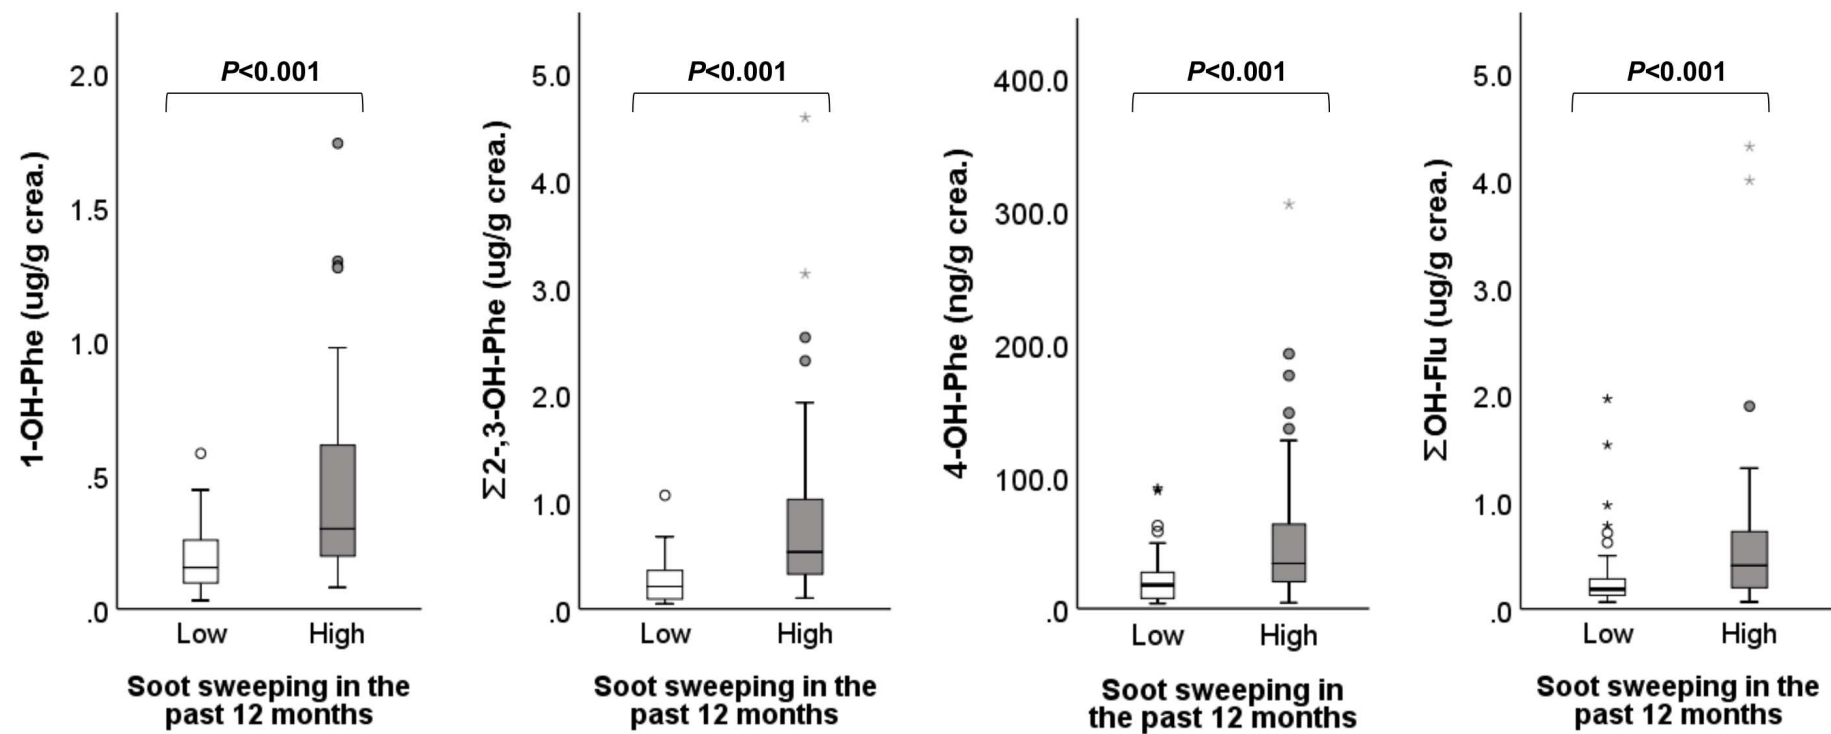

**Fig. S1.** Differences in urinary PAH metabolite concentrations for chimney sweeps who spent  $\geq 50\%$  of their time doing soot sweeping in the past 12 months versus those who spent  $< 50\%$  (excluding current smokers).  $P$ -value was derived from Mann-Whitney U test.  $\Sigma 2-,3\text{-OH-Phe}$  refers to the sum of 2- and 3-hydroxyphenanthrene and similarly,  $\Sigma \text{OH-Flu}$  refers to the sum of 2- and 3-hydroxyfluorene.



**References**

Alhamdow A, Lindh C, Hagberg J et al. DNA methylation of the cancer-related genes *F2RL3* and *AHRR* is associated with occupational exposure to polycyclic aromatic hydrocarbons. *Carcinogenesis* 2018;39:869-878.
